# Supplementary material for: Unravelling the role of protein kinase CK2 in metal toxicity using gene deletion mutants
Source: Royal Society of Chemistry journal article supplement (doi:10.1039/c6mt00230g), 2017-01-01
Supplement: c6mt00230g1.xlsx [file c6mt00230g1.xlsx]

## Sheet: Sheet1
Genes deleted	Genotype	Note
CKA1;AFT1	ura3Δ; leu2Δ0; his3Δ1; can1Δ::LEU2-MFA1p-HIS3; cka1Δ0::URA; atf1∆0::KanMX
CKA1;AFT2	ura3Δ; leu2Δ0; his3Δ1; can1Δ::LEU2-MFA1p-HIS3; cka1Δ0::URA; atf2∆0::KanMX
CKA1;ARR1	ura3Δ; leu2Δ0; his3Δ1; can1Δ::LEU2-MFA1p-HIS3; cka1Δ0::URA; arr1∆0::KanMX
CKA1;ARR2	ura3Δ; leu2Δ0; his3Δ1; can1Δ::LEU2-MFA1p-HIS3; cka1Δ0::URA; arr2∆0::KanMX
CKA1;ARR3	ura3Δ; leu2Δ0; his3Δ1; can1Δ::LEU2-MFA1p-HIS3; cka1Δ0::URA; arr3∆0::KanMX
CKA1;ASK10	ura3Δ; leu2Δ0; his3Δ1; can1Δ::LEU2-MFA1p-HIS3; cka1Δ0::URA; ask10∆0::KanMX
CKA1;ATX2	ura3Δ; leu2Δ0; his3Δ1; can1Δ::LEU2-MFA1p-HIS3; cka1Δ0::URA; atx2∆0::KanMX
CKA1;BUL1	ura3Δ; leu2Δ0; his3Δ1; can1Δ::LEU2-MFA1p-HIS3; cka1Δ0::URA; bul1∆0::KanMX
CKA1;CCH1	ura3Δ; leu2Δ0; his3Δ1; can1Δ::LEU2-MFA1p-HIS3; cka1Δ0::URA; cch1∆0::KanMX
CKA1;CKA1	ura3Δ; leu2Δ0; his3Δ1; can1Δ::LEU2-MFA1p-HIS3; cka1Δ0::URA; cka1∆0::KanMX	Not viable
CKA1;CKA2	ura3Δ; leu2Δ0; his3Δ1; can1Δ::LEU2-MFA1p-HIS3; cka1Δ0::URA; cka2∆0::KanMX	Not viable
CKA1;CKB1	ura3Δ; leu2Δ0; his3Δ1; can1Δ::LEU2-MFA1p-HIS3; cka1Δ0::URA; ckb1∆0::KanMX
CKA1;CKB2	ura3Δ; leu2Δ0; his3Δ1; can1Δ::LEU2-MFA1p-HIS3; cka1Δ0::URA; ckb2∆0::KanMX
CKA1;COT1	ura3Δ; leu2Δ0; his3Δ1; can1Δ::LEU2-MFA1p-HIS3; cka1Δ0::URA; cot1∆0::KanMX
CKA1;CUP2	ura3Δ; leu2Δ0; his3Δ1; can1Δ::LEU2-MFA1p-HIS3; cka1Δ0::URA; cup2∆0::KanMX
CKA1;DNF1	ura3Δ; leu2Δ0; his3Δ1; can1Δ::LEU2-MFA1p-HIS3; cka1Δ0::URA; dnf1∆0::KanMX
CKA1;FET3	ura3Δ; leu2Δ0; his3Δ1; can1Δ::LEU2-MFA1p-HIS3; cka1Δ0::URA; fet3∆0::KanMX
CKA1;FET4	ura3Δ; leu2Δ0; his3Δ1; can1Δ::LEU2-MFA1p-HIS3; cka1Δ0::URA; fet4∆0::KanMX
CKA1;FET5	ura3Δ; leu2Δ0; his3Δ1; can1Δ::LEU2-MFA1p-HIS3; cka1Δ0::URA; fet5∆0::KanMX
CKA1;FIT2	ura3Δ; leu2Δ0; his3Δ1; can1Δ::LEU2-MFA1p-HIS3; cka1Δ0::URA; fit2∆0::KanMX
CKA1;FIT3	ura3Δ; leu2Δ0; his3Δ1; can1Δ::LEU2-MFA1p-HIS3; cka1Δ0::URA; fit3∆0::KanMX
CKA1;FPS1	ura3Δ; leu2Δ0; his3Δ1; can1Δ::LEU2-MFA1p-HIS3; cka1Δ0::URA; fps1∆0::KanMX
CKA1;GUP1	ura3Δ; leu2Δ0; his3Δ1; can1Δ::LEU2-MFA1p-HIS3; cka1Δ0::URA; gup1∆0::KanMX
CKA1;HOG1	ura3Δ; leu2Δ0; his3Δ1; can1Δ::LEU2-MFA1p-HIS3; cka1Δ0::URA; hog1∆0::KanMX
CKA1;LEM3	ura3Δ; leu2Δ0; his3Δ1; can1Δ::LEU2-MFA1p-HIS3; cka1Δ0::URA; lem3∆0::KanMX
CKA1;MID1	ura3Δ; leu2Δ0; his3Δ1; can1Δ::LEU2-MFA1p-HIS3; cka1Δ0::URA; mid1∆0::KanMX
CKA1;MMT1	ura3Δ; leu2Δ0; his3Δ1; can1Δ::LEU2-MFA1p-HIS3; cka1Δ0::URA; mmt1∆0::KanMX
CKA1;MMT2	ura3Δ; leu2Δ0; his3Δ1; can1Δ::LEU2-MFA1p-HIS3; cka1Δ0::URA; mmt2∆0::KanMX
CKA1;MRS3	ura3Δ; leu2Δ0; his3Δ1; can1Δ::LEU2-MFA1p-HIS3; cka1Δ0::URA; mrs3∆0::KanMX
CKA1;MRS4	ura3Δ; leu2Δ0; his3Δ1; can1Δ::LEU2-MFA1p-HIS3; cka1Δ0::URA; mrs4∆0::KanMX
CKA1;MSC2	ura3Δ; leu2Δ0; his3Δ1; can1Δ::LEU2-MFA1p-HIS3; cka1Δ0::URA; msc2∆0::KanMX
CKA1;MTF1	ura3Δ; leu2Δ0; his3Δ1; can1Δ::LEU2-MFA1p-HIS3; cka1Δ0::URA; mtf1∆0::KanMX
CKA1;PBS2	ura3Δ; leu2Δ0; his3Δ1; can1Δ::LEU2-MFA1p-HIS3; cka1Δ0::URA; pbs2∆0::KanMX
CKA1;PHO4	ura3Δ; leu2Δ0; his3Δ1; can1Δ::LEU2-MFA1p-HIS3; cka1Δ0::URA; pho4∆0::KanMX
CKA1;PHO81	ura3Δ; leu2Δ0; his3Δ1; can1Δ::LEU2-MFA1p-HIS3; cka1Δ0::URA; pho81∆0::KanMX
CKA1;PHO84	ura3Δ; leu2Δ0; his3Δ1; can1Δ::LEU2-MFA1p-HIS3; cka1Δ0::URA; pho84∆0::KanMX
CKA1;PMC1	ura3Δ; leu2Δ0; his3Δ1; can1Δ::LEU2-MFA1p-HIS3; cka1Δ0::URA; pmc1∆0::KanMX
CKA1;PMR1	ura3Δ; leu2Δ0; his3Δ1; can1Δ::LEU2-MFA1p-HIS3; cka1Δ0::URA; pmr1∆0::KanMX
CKA1;SLT2	ura3Δ; leu2Δ0; his3Δ1; can1Δ::LEU2-MFA1p-HIS3; cka1Δ0::URA; slt2∆0::KanMX
CKA1;SNF3	ura3Δ; leu2Δ0; his3Δ1; can1Δ::LEU2-MFA1p-HIS3; cka1Δ0::URA; snf3∆0::KanMX
CKA1;SSK1	ura3Δ; leu2Δ0; his3Δ1; can1Δ::LEU2-MFA1p-HIS3; cka1Δ0::URA; ssk1∆0::KanMX
CKA1;SSK2	ura3Δ; leu2Δ0; his3Δ1; can1Δ::LEU2-MFA1p-HIS3; cka1Δ0::URA; ssk2∆0::KanMX
CKA1;SSK22	ura3Δ; leu2Δ0; his3Δ1; can1Δ::LEU2-MFA1p-HIS3; cka1Δ0::URA; ssk22∆0::KanMX
CKA1;SSU1	ura3Δ; leu2Δ0; his3Δ1; can1Δ::LEU2-MFA1p-HIS3; cka1Δ0::URA; ssu1∆0::KanMX
CKA1;SUL1	ura3Δ; leu2Δ0; his3Δ1; can1Δ::LEU2-MFA1p-HIS3; cka1Δ0::URA; sul1∆0::KanMX
CKA1;VCX1	ura3Δ; leu2Δ0; his3Δ1; can1Δ::LEU2-MFA1p-HIS3; cka1Δ0::URA; vcx1∆0::KanMX
CKA1;YAP1	ura3Δ; leu2Δ0; his3Δ1; can1Δ::LEU2-MFA1p-HIS3; cka1Δ0::URA; yap1∆0::KanMX
CKA1;YAP3	ura3Δ; leu2Δ0; his3Δ1; can1Δ::LEU2-MFA1p-HIS3; cka1Δ0::URA; yap3∆0::KanMX
CKA1;YCF1	ura3Δ; leu2Δ0; his3Δ1; can1Δ::LEU2-MFA1p-HIS3; cka1Δ0::URA; ycf1∆0::KanMX
CKA1;YKE4	ura3Δ; leu2Δ0; his3Δ1; can1Δ::LEU2-MFA1p-HIS3; cka1Δ0::URA; yke4∆0::KanMX
CKA1;YPK1	ura3Δ; leu2Δ0; his3Δ1; can1Δ::LEU2-MFA1p-HIS3; cka1Δ0::URA; ypk1∆0::KanMX
CKA1;YVC1	ura3Δ; leu2Δ0; his3Δ1; can1Δ::LEU2-MFA1p-HIS3; cka1Δ0::URA; yvc1∆0::KanMX
CKA1;ZAP1	ura3Δ; leu2Δ0; his3Δ1; can1Δ::LEU2-MFA1p-HIS3; cka1Δ0::URA; zap1∆0::KanMX
CKA1;ZPS1	ura3Δ; leu2Δ0; his3Δ1; can1Δ::LEU2-MFA1p-HIS3; cka1Δ0::URA; zps1∆0::KanMX
CKA1;ZRC1	ura3Δ; leu2Δ0; his3Δ1; can1Δ::LEU2-MFA1p-HIS3; cka1Δ0::URA; zrc1∆0::KanMX
CKA1;ZRG17	ura3Δ; leu2Δ0; his3Δ1; can1Δ::LEU2-MFA1p-HIS3; cka1Δ0::URA; zrg17∆0::KanMX
CKA1;ZRG8	ura3Δ; leu2Δ0; his3Δ1; can1Δ::LEU2-MFA1p-HIS3; cka1Δ0::URA; zrg8∆0::KanMX
CKA1;ZRT1	ura3Δ; leu2Δ0; his3Δ1; can1Δ::LEU2-MFA1p-HIS3; cka1Δ0::URA; zrt1∆0::KanMX
CKA1;ZRT2	ura3Δ; leu2Δ0; his3Δ1; can1Δ::LEU2-MFA1p-HIS3; cka1Δ0::URA; zrt2∆0::KanMX
CKA1;ZRT3	ura3Δ; leu2Δ0; his3Δ1; can1Δ::LEU2-MFA1p-HIS3; cka1Δ0::URA; zrt3∆0::KanMX
CKA2;AFT1	ura3Δ; leu2Δ0; his3Δ1; can1Δ::LEU2-MFA1p-HIS3; cka2Δ0::URA; atf1∆0::KanMX
CKA2;AFT2	ura3Δ; leu2Δ0; his3Δ1; can1Δ::LEU2-MFA1p-HIS3; cka2Δ0::URA; atf2∆0::KanMX
CKA2;ARR1	ura3Δ; leu2Δ0; his3Δ1; can1Δ::LEU2-MFA1p-HIS3; cka2Δ0::URA; arr1∆0::KanMX
CKA2;ARR2	ura3Δ; leu2Δ0; his3Δ1; can1Δ::LEU2-MFA1p-HIS3; cka2Δ0::URA; arr2∆0::KanMX
CKA2;ARR3	ura3Δ; leu2Δ0; his3Δ1; can1Δ::LEU2-MFA1p-HIS3; cka2Δ0::URA; arr3∆0::KanMX
CKA2;ASK10	ura3Δ; leu2Δ0; his3Δ1; can1Δ::LEU2-MFA1p-HIS3; cka2Δ0::URA; ask10∆0::KanMX
CKA2;ATX2	ura3Δ; leu2Δ0; his3Δ1; can1Δ::LEU2-MFA1p-HIS3; cka2Δ0::URA; atx2∆0::KanMX
CKA2;BUL1	ura3Δ; leu2Δ0; his3Δ1; can1Δ::LEU2-MFA1p-HIS3; cka2Δ0::URA; bul1∆0::KanMX
CKA2;CCH1	ura3Δ; leu2Δ0; his3Δ1; can1Δ::LEU2-MFA1p-HIS3; cka2Δ0::URA; cch1∆0::KanMX
CKA2;CKA1	ura3Δ; leu2Δ0; his3Δ1; can1Δ::LEU2-MFA1p-HIS3; cka2Δ0::URA; cka1∆0::KanMX	not viable
CKA2;CKA2	ura3Δ; leu2Δ0; his3Δ1; can1Δ::LEU2-MFA1p-HIS3; cka2Δ0::URA; cka2∆0::KanMX	not viable
CKA2;CKB1	ura3Δ; leu2Δ0; his3Δ1; can1Δ::LEU2-MFA1p-HIS3; cka2Δ0::URA; ckb1∆0::KanMX
CKA2;CKB2	ura3Δ; leu2Δ0; his3Δ1; can1Δ::LEU2-MFA1p-HIS3; cka2Δ0::URA; ckb2∆0::KanMX
CKA2;COT1	ura3Δ; leu2Δ0; his3Δ1; can1Δ::LEU2-MFA1p-HIS3; cka2Δ0::URA; cot1∆0::KanMX
CKA2;CUP2	ura3Δ; leu2Δ0; his3Δ1; can1Δ::LEU2-MFA1p-HIS3; cka2Δ0::URA; cup2∆0::KanMX
CKA2;DNF1	ura3Δ; leu2Δ0; his3Δ1; can1Δ::LEU2-MFA1p-HIS3; cka2Δ0::URA; dnf1∆0::KanMX
CKA2;FET3	ura3Δ; leu2Δ0; his3Δ1; can1Δ::LEU2-MFA1p-HIS3; cka2Δ0::URA; fet3∆0::KanMX
CKA2;FET4	ura3Δ; leu2Δ0; his3Δ1; can1Δ::LEU2-MFA1p-HIS3; cka2Δ0::URA; fet4∆0::KanMX
CKA2;FET5	ura3Δ; leu2Δ0; his3Δ1; can1Δ::LEU2-MFA1p-HIS3; cka2Δ0::URA; fet5∆0::KanMX
CKA2;FIT2	ura3Δ; leu2Δ0; his3Δ1; can1Δ::LEU2-MFA1p-HIS3; cka2Δ0::URA; fit2∆0::KanMX
CKA2;FIT3	ura3Δ; leu2Δ0; his3Δ1; can1Δ::LEU2-MFA1p-HIS3; cka2Δ0::URA; fit3∆0::KanMX
CKA2;FPS1	ura3Δ; leu2Δ0; his3Δ1; can1Δ::LEU2-MFA1p-HIS3; cka2Δ0::URA; fps1∆0::KanMX
CKA2;GUP1	ura3Δ; leu2Δ0; his3Δ1; can1Δ::LEU2-MFA1p-HIS3; cka2Δ0::URA; gup1∆0::KanMX
CKA2;HOG1	ura3Δ; leu2Δ0; his3Δ1; can1Δ::LEU2-MFA1p-HIS3; cka2Δ0::URA; hog1∆0::KanMX
CKA2;LEM3	ura3Δ; leu2Δ0; his3Δ1; can1Δ::LEU2-MFA1p-HIS3; cka2Δ0::URA; lem3∆0::KanMX
CKA2;MID1	ura3Δ; leu2Δ0; his3Δ1; can1Δ::LEU2-MFA1p-HIS3; cka2Δ0::URA; mid1∆0::KanMX
CKA2;MMT1	ura3Δ; leu2Δ0; his3Δ1; can1Δ::LEU2-MFA1p-HIS3; cka2Δ0::URA; mmt1∆0::KanMX
CKA2;MMT2	ura3Δ; leu2Δ0; his3Δ1; can1Δ::LEU2-MFA1p-HIS3; cka2Δ0::URA; mmt2∆0::KanMX
CKA2;MRS3	ura3Δ; leu2Δ0; his3Δ1; can1Δ::LEU2-MFA1p-HIS3; cka2Δ0::URA; mrs3∆0::KanMX
CKA2;MRS4	ura3Δ; leu2Δ0; his3Δ1; can1Δ::LEU2-MFA1p-HIS3; cka2Δ0::URA; mrs4∆0::KanMX
CKA2;MSC2	ura3Δ; leu2Δ0; his3Δ1; can1Δ::LEU2-MFA1p-HIS3; cka2Δ0::URA; msc2∆0::KanMX
CKA2;MTF1	ura3Δ; leu2Δ0; his3Δ1; can1Δ::LEU2-MFA1p-HIS3; cka2Δ0::URA; mtf1∆0::KanMX
CKA2;PBS2	ura3Δ; leu2Δ0; his3Δ1; can1Δ::LEU2-MFA1p-HIS3; cka2Δ0::URA; pbs2∆0::KanMX
CKA2;PHO4	ura3Δ; leu2Δ0; his3Δ1; can1Δ::LEU2-MFA1p-HIS3; cka2Δ0::URA; pho4∆0::KanMX
CKA2;PHO81	ura3Δ; leu2Δ0; his3Δ1; can1Δ::LEU2-MFA1p-HIS3; cka2Δ0::URA; pho81∆0::KanMX
CKA2;PHO84	ura3Δ; leu2Δ0; his3Δ1; can1Δ::LEU2-MFA1p-HIS3; cka2Δ0::URA; pho84∆0::KanMX
CKA2;PMC1	ura3Δ; leu2Δ0; his3Δ1; can1Δ::LEU2-MFA1p-HIS3; cka2Δ0::URA; pmc1∆0::KanMX
CKA2;PMR1	ura3Δ; leu2Δ0; his3Δ1; can1Δ::LEU2-MFA1p-HIS3; cka2Δ0::URA; pmr1∆0::KanMX
CKA2;SLT2	ura3Δ; leu2Δ0; his3Δ1; can1Δ::LEU2-MFA1p-HIS3; cka2Δ0::URA; slt2∆0::KanMX
CKA2;SNF3	ura3Δ; leu2Δ0; his3Δ1; can1Δ::LEU2-MFA1p-HIS3; cka2Δ0::URA; snf3∆0::KanMX
CKA2;SSK1	ura3Δ; leu2Δ0; his3Δ1; can1Δ::LEU2-MFA1p-HIS3; cka2Δ0::URA; ssk1∆0::KanMX
CKA2;SSK2	ura3Δ; leu2Δ0; his3Δ1; can1Δ::LEU2-MFA1p-HIS3; cka2Δ0::URA; ssk2∆0::KanMX
CKA2;SSK22	ura3Δ; leu2Δ0; his3Δ1; can1Δ::LEU2-MFA1p-HIS3; cka2Δ0::URA; ssk22∆0::KanMX
CKA2;SSU1	ura3Δ; leu2Δ0; his3Δ1; can1Δ::LEU2-MFA1p-HIS3; cka2Δ0::URA; ssu1∆0::KanMX
CKA2;SUL1	ura3Δ; leu2Δ0; his3Δ1; can1Δ::LEU2-MFA1p-HIS3; cka2Δ0::URA; sul1∆0::KanMX
CKA2;VCX1	ura3Δ; leu2Δ0; his3Δ1; can1Δ::LEU2-MFA1p-HIS3; cka2Δ0::URA; vcx1∆0::KanMX
CKA2;YAP1	ura3Δ; leu2Δ0; his3Δ1; can1Δ::LEU2-MFA1p-HIS3; cka2Δ0::URA; yap1∆0::KanMX
CKA2;YAP3	ura3Δ; leu2Δ0; his3Δ1; can1Δ::LEU2-MFA1p-HIS3; cka2Δ0::URA; yap3∆0::KanMX
CKA2;YCF1	ura3Δ; leu2Δ0; his3Δ1; can1Δ::LEU2-MFA1p-HIS3; cka2Δ0::URA; ycf1∆0::KanMX
CKA2;YKE4	ura3Δ; leu2Δ0; his3Δ1; can1Δ::LEU2-MFA1p-HIS3; cka2Δ0::URA; yke4∆0::KanMX
CKA2;YPK1	ura3Δ; leu2Δ0; his3Δ1; can1Δ::LEU2-MFA1p-HIS3; cka2Δ0::URA; ypk1∆0::KanMX
CKA2;YVC1	ura3Δ; leu2Δ0; his3Δ1; can1Δ::LEU2-MFA1p-HIS3; cka2Δ0::URA; yvc1∆0::KanMX
CKA2;ZAP1	ura3Δ; leu2Δ0; his3Δ1; can1Δ::LEU2-MFA1p-HIS3; cka2Δ0::URA; zap1∆0::KanMX
CKA2;ZPS1	ura3Δ; leu2Δ0; his3Δ1; can1Δ::LEU2-MFA1p-HIS3; cka2Δ0::URA; zps1∆0::KanMX
CKA2;ZRC1	ura3Δ; leu2Δ0; his3Δ1; can1Δ::LEU2-MFA1p-HIS3; cka2Δ0::URA; zrc1∆0::KanMX
CKA2;ZRG17	ura3Δ; leu2Δ0; his3Δ1; can1Δ::LEU2-MFA1p-HIS3; cka2Δ0::URA; zrg17∆0::KanMX
CKA2;ZRG8	ura3Δ; leu2Δ0; his3Δ1; can1Δ::LEU2-MFA1p-HIS3; cka2Δ0::URA; zrg8∆0::KanMX
CKA2;ZRT1	ura3Δ; leu2Δ0; his3Δ1; can1Δ::LEU2-MFA1p-HIS3; cka2Δ0::URA; zrt1∆0::KanMX
CKA2;ZRT2	ura3Δ; leu2Δ0; his3Δ1; can1Δ::LEU2-MFA1p-HIS3; cka2Δ0::URA; zrt2∆0::KanMX
CKA2;ZRT3	ura3Δ; leu2Δ0; his3Δ1; can1Δ::LEU2-MFA1p-HIS3; cka2Δ0::URA; zrt3∆0::KanMX
CKB1;AFT1	ura3Δ; leu2Δ0; his3Δ1; can1Δ::LEU2-MFA1p-HIS3; ckb1Δ0::URA; atf1∆0::KanMX
CKB1;AFT2	ura3Δ; leu2Δ0; his3Δ1; can1Δ::LEU2-MFA1p-HIS3; ckb1Δ0::URA; atf2∆0::KanMX
CKB1;ARR1	ura3Δ; leu2Δ0; his3Δ1; can1Δ::LEU2-MFA1p-HIS3; ckb1Δ0::URA; arr1∆0::KanMX
CKB1;ARR2	ura3Δ; leu2Δ0; his3Δ1; can1Δ::LEU2-MFA1p-HIS3; ckb1Δ0::URA; arr2∆0::KanMX
CKB1;ARR3	ura3Δ; leu2Δ0; his3Δ1; can1Δ::LEU2-MFA1p-HIS3; ckb1Δ0::URA; arr3∆0::KanMX
CKB1;ASK10	ura3Δ; leu2Δ0; his3Δ1; can1Δ::LEU2-MFA1p-HIS3; ckb1Δ0::URA; ask10∆0::KanMX
CKB1;ATX2	ura3Δ; leu2Δ0; his3Δ1; can1Δ::LEU2-MFA1p-HIS3; ckb1Δ0::URA; atx2∆0::KanMX
CKB1;BUL1	ura3Δ; leu2Δ0; his3Δ1; can1Δ::LEU2-MFA1p-HIS3; ckb1Δ0::URA; bul1∆0::KanMX
CKB1;CCH1	ura3Δ; leu2Δ0; his3Δ1; can1Δ::LEU2-MFA1p-HIS3; ckb1Δ0::URA; cch1∆0::KanMX
CKB1;CKA1	ura3Δ; leu2Δ0; his3Δ1; can1Δ::LEU2-MFA1p-HIS3; ckb1Δ0::URA; cka1∆0::KanMX
CKB1;CKA2	ura3Δ; leu2Δ0; his3Δ1; can1Δ::LEU2-MFA1p-HIS3; ckb1Δ0::URA; cka2∆0::KanMX
CKB1;CKB1	ura3Δ; leu2Δ0; his3Δ1; can1Δ::LEU2-MFA1p-HIS3; ckb1Δ0::URA; ckb1∆0::KanMX	not viable
CKB1;CKB2	ura3Δ; leu2Δ0; his3Δ1; can1Δ::LEU2-MFA1p-HIS3; ckb1Δ0::URA; ckb2∆0::KanMX
CKB1;COT1	ura3Δ; leu2Δ0; his3Δ1; can1Δ::LEU2-MFA1p-HIS3; ckb1Δ0::URA; cot1∆0::KanMX
CKB1;CUP2	ura3Δ; leu2Δ0; his3Δ1; can1Δ::LEU2-MFA1p-HIS3; ckb1Δ0::URA; cup2∆0::KanMX
CKB1;DNF1	ura3Δ; leu2Δ0; his3Δ1; can1Δ::LEU2-MFA1p-HIS3; ckb1Δ0::URA; dnf1∆0::KanMX
CKB1;FET3	ura3Δ; leu2Δ0; his3Δ1; can1Δ::LEU2-MFA1p-HIS3; ckb1Δ0::URA; fet3∆0::KanMX
CKB1;FET4	ura3Δ; leu2Δ0; his3Δ1; can1Δ::LEU2-MFA1p-HIS3; ckb1Δ0::URA; fet4∆0::KanMX
CKB1;FET5	ura3Δ; leu2Δ0; his3Δ1; can1Δ::LEU2-MFA1p-HIS3; ckb1Δ0::URA; fet5∆0::KanMX
CKB1;FIT2	ura3Δ; leu2Δ0; his3Δ1; can1Δ::LEU2-MFA1p-HIS3; ckb1Δ0::URA; fit2∆0::KanMX
CKB1;FIT3	ura3Δ; leu2Δ0; his3Δ1; can1Δ::LEU2-MFA1p-HIS3; ckb1Δ0::URA; fit3∆0::KanMX
CKB1;FPS1	ura3Δ; leu2Δ0; his3Δ1; can1Δ::LEU2-MFA1p-HIS3; ckb1Δ0::URA; fps1∆0::KanMX
CKB1;GUP1	ura3Δ; leu2Δ0; his3Δ1; can1Δ::LEU2-MFA1p-HIS3; ckb1Δ0::URA; gup1∆0::KanMX
CKB1;HOG1	ura3Δ; leu2Δ0; his3Δ1; can1Δ::LEU2-MFA1p-HIS3; ckb1Δ0::URA; hog1∆0::KanMX
CKB1;LEM3	ura3Δ; leu2Δ0; his3Δ1; can1Δ::LEU2-MFA1p-HIS3; ckb1Δ0::URA; lem3∆0::KanMX
CKB1;MID1	ura3Δ; leu2Δ0; his3Δ1; can1Δ::LEU2-MFA1p-HIS3; ckb1Δ0::URA; mid1∆0::KanMX
CKB1;MMT1	ura3Δ; leu2Δ0; his3Δ1; can1Δ::LEU2-MFA1p-HIS3; ckb1Δ0::URA; mmt1∆0::KanMX
CKB1;MMT2	ura3Δ; leu2Δ0; his3Δ1; can1Δ::LEU2-MFA1p-HIS3; ckb1Δ0::URA; mmt2∆0::KanMX
CKB1;MRS3	ura3Δ; leu2Δ0; his3Δ1; can1Δ::LEU2-MFA1p-HIS3; ckb1Δ0::URA; mrs3∆0::KanMX
CKB1;MRS4	ura3Δ; leu2Δ0; his3Δ1; can1Δ::LEU2-MFA1p-HIS3; ckb1Δ0::URA; mrs4∆0::KanMX
CKB1;MSC2	ura3Δ; leu2Δ0; his3Δ1; can1Δ::LEU2-MFA1p-HIS3; ckb1Δ0::URA; msc2∆0::KanMX
CKB1;MTF1	ura3Δ; leu2Δ0; his3Δ1; can1Δ::LEU2-MFA1p-HIS3; ckb1Δ0::URA; mtf1∆0::KanMX
CKB1;PBS2	ura3Δ; leu2Δ0; his3Δ1; can1Δ::LEU2-MFA1p-HIS3; ckb1Δ0::URA; pbs2∆0::KanMX
CKB1;PHO4	ura3Δ; leu2Δ0; his3Δ1; can1Δ::LEU2-MFA1p-HIS3; ckb1Δ0::URA; pho4∆0::KanMX
CKB1;PHO81	ura3Δ; leu2Δ0; his3Δ1; can1Δ::LEU2-MFA1p-HIS3; ckb1Δ0::URA; pho81∆0::KanMX
CKB1;PHO84	ura3Δ; leu2Δ0; his3Δ1; can1Δ::LEU2-MFA1p-HIS3; ckb1Δ0::URA; pho84∆0::KanMX
CKB1;PMC1	ura3Δ; leu2Δ0; his3Δ1; can1Δ::LEU2-MFA1p-HIS3; ckb1Δ0::URA; pmc1∆0::KanMX
CKB1;PMR1	ura3Δ; leu2Δ0; his3Δ1; can1Δ::LEU2-MFA1p-HIS3; ckb1Δ0::URA; pmr1∆0::KanMX
CKB1;SLT2	ura3Δ; leu2Δ0; his3Δ1; can1Δ::LEU2-MFA1p-HIS3; ckb1Δ0::URA; slt2∆0::KanMX
CKB1;SNF3	ura3Δ; leu2Δ0; his3Δ1; can1Δ::LEU2-MFA1p-HIS3; ckb1Δ0::URA; snf3∆0::KanMX
CKB1;SSK1	ura3Δ; leu2Δ0; his3Δ1; can1Δ::LEU2-MFA1p-HIS3; ckb1Δ0::URA; ssk1∆0::KanMX
CKB1;SSK2	ura3Δ; leu2Δ0; his3Δ1; can1Δ::LEU2-MFA1p-HIS3; ckb1Δ0::URA; ssk2∆0::KanMX
CKB1;SSK22	ura3Δ; leu2Δ0; his3Δ1; can1Δ::LEU2-MFA1p-HIS3; ckb1Δ0::URA; ssk22∆0::KanMX
CKB1;SSU1	ura3Δ; leu2Δ0; his3Δ1; can1Δ::LEU2-MFA1p-HIS3; ckb1Δ0::URA; ssu1∆0::KanMX
CKB1;SUL1	ura3Δ; leu2Δ0; his3Δ1; can1Δ::LEU2-MFA1p-HIS3; ckb1Δ0::URA; sul1∆0::KanMX
CKB1;VCX1	ura3Δ; leu2Δ0; his3Δ1; can1Δ::LEU2-MFA1p-HIS3; ckb1Δ0::URA; vcx1∆0::KanMX
CKB1;YAP1	ura3Δ; leu2Δ0; his3Δ1; can1Δ::LEU2-MFA1p-HIS3; ckb1Δ0::URA; yap1∆0::KanMX
CKB1;YAP3	ura3Δ; leu2Δ0; his3Δ1; can1Δ::LEU2-MFA1p-HIS3; ckb1Δ0::URA; yap3∆0::KanMX
CKB1;YCF1	ura3Δ; leu2Δ0; his3Δ1; can1Δ::LEU2-MFA1p-HIS3; ckb1Δ0::URA; ycf1∆0::KanMX
CKB1;YKE4	ura3Δ; leu2Δ0; his3Δ1; can1Δ::LEU2-MFA1p-HIS3; ckb1Δ0::URA; yke4∆0::KanMX
CKB1;YPK1	ura3Δ; leu2Δ0; his3Δ1; can1Δ::LEU2-MFA1p-HIS3; ckb1Δ0::URA; ypk1∆0::KanMX
CKB1;YVC1	ura3Δ; leu2Δ0; his3Δ1; can1Δ::LEU2-MFA1p-HIS3; ckb1Δ0::URA; yvc1∆0::KanMX
CKB1;ZAP1	ura3Δ; leu2Δ0; his3Δ1; can1Δ::LEU2-MFA1p-HIS3; ckb1Δ0::URA; zap1∆0::KanMX
CKB1;ZPS1	ura3Δ; leu2Δ0; his3Δ1; can1Δ::LEU2-MFA1p-HIS3; ckb1Δ0::URA; zps1∆0::KanMX
CKB1;ZRC1	ura3Δ; leu2Δ0; his3Δ1; can1Δ::LEU2-MFA1p-HIS3; ckb1Δ0::URA; zrc1∆0::KanMX
CKB1;ZRG17	ura3Δ; leu2Δ0; his3Δ1; can1Δ::LEU2-MFA1p-HIS3; ckb1Δ0::URA; zrg17∆0::KanMX
CKB1;ZRG8	ura3Δ; leu2Δ0; his3Δ1; can1Δ::LEU2-MFA1p-HIS3; ckb1Δ0::URA; zrg8∆0::KanMX
CKB1;ZRT1	ura3Δ; leu2Δ0; his3Δ1; can1Δ::LEU2-MFA1p-HIS3; ckb1Δ0::URA; zrt1∆0::KanMX
CKB1;ZRT2	ura3Δ; leu2Δ0; his3Δ1; can1Δ::LEU2-MFA1p-HIS3; ckb1Δ0::URA; zrt2∆0::KanMX
CKB1;ZRT3	ura3Δ; leu2Δ0; his3Δ1; can1Δ::LEU2-MFA1p-HIS3; ckb1Δ0::URA; zrt3∆0::KanMX
CKB2;AFT1	ura3Δ; leu2Δ0; his3Δ1; can1Δ::LEU2-MFA1p-HIS3; ckb2Δ0::URA; atf1∆0::KanMX
CKB2;AFT2	ura3Δ; leu2Δ0; his3Δ1; can1Δ::LEU2-MFA1p-HIS3; ckb2Δ0::URA; atf2∆0::KanMX
CKB2;ARR1	ura3Δ; leu2Δ0; his3Δ1; can1Δ::LEU2-MFA1p-HIS3; ckb2Δ0::URA; arr1∆0::KanMX
CKB2;ARR2	ura3Δ; leu2Δ0; his3Δ1; can1Δ::LEU2-MFA1p-HIS3; ckb2Δ0::URA; arr2∆0::KanMX
CKB2;ARR3	ura3Δ; leu2Δ0; his3Δ1; can1Δ::LEU2-MFA1p-HIS3; ckb2Δ0::URA; arr3∆0::KanMX
CKB2;ASK10	ura3Δ; leu2Δ0; his3Δ1; can1Δ::LEU2-MFA1p-HIS3; ckb2Δ0::URA; ask10∆0::KanMX
CKB2;ATX2	ura3Δ; leu2Δ0; his3Δ1; can1Δ::LEU2-MFA1p-HIS3; ckb2Δ0::URA; atx2∆0::KanMX
CKB2;BUL1	ura3Δ; leu2Δ0; his3Δ1; can1Δ::LEU2-MFA1p-HIS3; ckb2Δ0::URA; bul1∆0::KanMX
CKB2;CCH1	ura3Δ; leu2Δ0; his3Δ1; can1Δ::LEU2-MFA1p-HIS3; ckb2Δ0::URA; cch1∆0::KanMX
CKB2;CKA1	ura3Δ; leu2Δ0; his3Δ1; can1Δ::LEU2-MFA1p-HIS3; ckb2Δ0::URA; cka1∆0::KanMX
CKB2;CKA2	ura3Δ; leu2Δ0; his3Δ1; can1Δ::LEU2-MFA1p-HIS3; ckb2Δ0::URA; cka2∆0::KanMX
CKB2;CKB1	ura3Δ; leu2Δ0; his3Δ1; can1Δ::LEU2-MFA1p-HIS3; ckb2Δ0::URA; ckb1∆0::KanMX
CKB2;CKB2	ura3Δ; leu2Δ0; his3Δ1; can1Δ::LEU2-MFA1p-HIS3; ckb2Δ0::URA; ckb2∆0::KanMX	not viable
CKB2;COT1	ura3Δ; leu2Δ0; his3Δ1; can1Δ::LEU2-MFA1p-HIS3; ckb2Δ0::URA; cot1∆0::KanMX
CKB2;CUP2	ura3Δ; leu2Δ0; his3Δ1; can1Δ::LEU2-MFA1p-HIS3; ckb2Δ0::URA; cup2∆0::KanMX
CKB2;DNF1	ura3Δ; leu2Δ0; his3Δ1; can1Δ::LEU2-MFA1p-HIS3; ckb2Δ0::URA; dnf1∆0::KanMX
CKB2;FET3	ura3Δ; leu2Δ0; his3Δ1; can1Δ::LEU2-MFA1p-HIS3; ckb2Δ0::URA; fet3∆0::KanMX
CKB2;FET4	ura3Δ; leu2Δ0; his3Δ1; can1Δ::LEU2-MFA1p-HIS3; ckb2Δ0::URA; fet4∆0::KanMX
CKB2;FET5	ura3Δ; leu2Δ0; his3Δ1; can1Δ::LEU2-MFA1p-HIS3; ckb2Δ0::URA; fet5∆0::KanMX
CKB2;FIT2	ura3Δ; leu2Δ0; his3Δ1; can1Δ::LEU2-MFA1p-HIS3; ckb2Δ0::URA; fit2∆0::KanMX
CKB2;FIT3	ura3Δ; leu2Δ0; his3Δ1; can1Δ::LEU2-MFA1p-HIS3; ckb2Δ0::URA; fit3∆0::KanMX
CKB2;FPS1	ura3Δ; leu2Δ0; his3Δ1; can1Δ::LEU2-MFA1p-HIS3; ckb2Δ0::URA; fps1∆0::KanMX
CKB2;GUP1	ura3Δ; leu2Δ0; his3Δ1; can1Δ::LEU2-MFA1p-HIS3; ckb2Δ0::URA; gup1∆0::KanMX
CKB2;HOG1	ura3Δ; leu2Δ0; his3Δ1; can1Δ::LEU2-MFA1p-HIS3; ckb2Δ0::URA; hog1∆0::KanMX
CKB2;LEM3	ura3Δ; leu2Δ0; his3Δ1; can1Δ::LEU2-MFA1p-HIS3; ckb2Δ0::URA; lem3∆0::KanMX
CKB2;MID1	ura3Δ; leu2Δ0; his3Δ1; can1Δ::LEU2-MFA1p-HIS3; ckb2Δ0::URA; mid1∆0::KanMX
CKB2;MMT1	ura3Δ; leu2Δ0; his3Δ1; can1Δ::LEU2-MFA1p-HIS3; ckb2Δ0::URA; mmt1∆0::KanMX
CKB2;MMT2	ura3Δ; leu2Δ0; his3Δ1; can1Δ::LEU2-MFA1p-HIS3; ckb2Δ0::URA; mmt2∆0::KanMX
CKB2;MRS3	ura3Δ; leu2Δ0; his3Δ1; can1Δ::LEU2-MFA1p-HIS3; ckb2Δ0::URA; mrs3∆0::KanMX
CKB2;MRS4	ura3Δ; leu2Δ0; his3Δ1; can1Δ::LEU2-MFA1p-HIS3; ckb2Δ0::URA; mrs4∆0::KanMX
CKB2;MSC2	ura3Δ; leu2Δ0; his3Δ1; can1Δ::LEU2-MFA1p-HIS3; ckb2Δ0::URA; msc2∆0::KanMX
CKB2;MTF1	ura3Δ; leu2Δ0; his3Δ1; can1Δ::LEU2-MFA1p-HIS3; ckb2Δ0::URA; mtf1∆0::KanMX
CKB2;PBS2	ura3Δ; leu2Δ0; his3Δ1; can1Δ::LEU2-MFA1p-HIS3; ckb2Δ0::URA; pbs2∆0::KanMX
CKB2;PHO4	ura3Δ; leu2Δ0; his3Δ1; can1Δ::LEU2-MFA1p-HIS3; ckb2Δ0::URA; pho4∆0::KanMX
CKB2;PHO81	ura3Δ; leu2Δ0; his3Δ1; can1Δ::LEU2-MFA1p-HIS3; ckb2Δ0::URA; pho81∆0::KanMX
CKB2;PHO84	ura3Δ; leu2Δ0; his3Δ1; can1Δ::LEU2-MFA1p-HIS3; ckb2Δ0::URA; pho84∆0::KanMX
CKB2;PMC1	ura3Δ; leu2Δ0; his3Δ1; can1Δ::LEU2-MFA1p-HIS3; ckb2Δ0::URA; pmc1∆0::KanMX
CKB2;PMR1	ura3Δ; leu2Δ0; his3Δ1; can1Δ::LEU2-MFA1p-HIS3; ckb2Δ0::URA; pmr1∆0::KanMX
CKB2;SLT2	ura3Δ; leu2Δ0; his3Δ1; can1Δ::LEU2-MFA1p-HIS3; ckb2Δ0::URA; slt2∆0::KanMX
CKB2;SNF3	ura3Δ; leu2Δ0; his3Δ1; can1Δ::LEU2-MFA1p-HIS3; ckb2Δ0::URA; snf3∆0::KanMX
CKB2;SSK1	ura3Δ; leu2Δ0; his3Δ1; can1Δ::LEU2-MFA1p-HIS3; ckb2Δ0::URA; ssk1∆0::KanMX
CKB2;SSK2	ura3Δ; leu2Δ0; his3Δ1; can1Δ::LEU2-MFA1p-HIS3; ckb2Δ0::URA; ssk2∆0::KanMX
CKB2;SSK22	ura3Δ; leu2Δ0; his3Δ1; can1Δ::LEU2-MFA1p-HIS3; ckb2Δ0::URA; ssk22∆0::KanMX
CKB2;SSU1	ura3Δ; leu2Δ0; his3Δ1; can1Δ::LEU2-MFA1p-HIS3; ckb2Δ0::URA; ssu1∆0::KanMX
CKB2;SUL1	ura3Δ; leu2Δ0; his3Δ1; can1Δ::LEU2-MFA1p-HIS3; ckb2Δ0::URA; sul1∆0::KanMX
CKB2;VCX1	ura3Δ; leu2Δ0; his3Δ1; can1Δ::LEU2-MFA1p-HIS3; ckb2Δ0::URA; vcx1∆0::KanMX
CKB2;YAP1	ura3Δ; leu2Δ0; his3Δ1; can1Δ::LEU2-MFA1p-HIS3; ckb2Δ0::URA; yap1∆0::KanMX
CKB2;YAP3	ura3Δ; leu2Δ0; his3Δ1; can1Δ::LEU2-MFA1p-HIS3; ckb2Δ0::URA; yap3∆0::KanMX
CKB2;YCF1	ura3Δ; leu2Δ0; his3Δ1; can1Δ::LEU2-MFA1p-HIS3; ckb2Δ0::URA; ycf1∆0::KanMX
CKB2;YKE4	ura3Δ; leu2Δ0; his3Δ1; can1Δ::LEU2-MFA1p-HIS3; ckb2Δ0::URA; yke4∆0::KanMX
CKB2;YPK1	ura3Δ; leu2Δ0; his3Δ1; can1Δ::LEU2-MFA1p-HIS3; ckb2Δ0::URA; ypk1∆0::KanMX
CKB2;YVC1	ura3Δ; leu2Δ0; his3Δ1; can1Δ::LEU2-MFA1p-HIS3; ckb2Δ0::URA; yvc1∆0::KanMX
CKB2;ZAP1	ura3Δ; leu2Δ0; his3Δ1; can1Δ::LEU2-MFA1p-HIS3; ckb2Δ0::URA; zap1∆0::KanMX
CKB2;ZPS1	ura3Δ; leu2Δ0; his3Δ1; can1Δ::LEU2-MFA1p-HIS3; ckb2Δ0::URA; zps1∆0::KanMX
CKB2;ZRC1	ura3Δ; leu2Δ0; his3Δ1; can1Δ::LEU2-MFA1p-HIS3; ckb2Δ0::URA; zrc1∆0::KanMX
CKB2;ZRG17	ura3Δ; leu2Δ0; his3Δ1; can1Δ::LEU2-MFA1p-HIS3; ckb2Δ0::URA; zrg17∆0::KanMX
CKB2;ZRG8	ura3Δ; leu2Δ0; his3Δ1; can1Δ::LEU2-MFA1p-HIS3; ckb2Δ0::URA; zrg8∆0::KanMX
CKB2;ZRT1	ura3Δ; leu2Δ0; his3Δ1; can1Δ::LEU2-MFA1p-HIS3; ckb2Δ0::URA; zrt1∆0::KanMX
CKB2;ZRT2	ura3Δ; leu2Δ0; his3Δ1; can1Δ::LEU2-MFA1p-HIS3; ckb2Δ0::URA; zrt2∆0::KanMX
CKB2;ZRT3	ura3Δ; leu2Δ0; his3Δ1; can1Δ::LEU2-MFA1p-HIS3; ckb2Δ0::URA; zrt3∆0::KanMX
